## S1 Appendix. Effects as a function of time elapsed since first vaccination

We estimate equation SM1, where  $Days_{it}$  equals the number of days elapsed since first receiving a vaccine dose (and zero for those who have not been vaccinated by time  $t$ ).  $\beta_0$  measures the initial impact of receiving the first dose, while  $\beta_d$  measures possible additional effects with the passage of time.

$$Y_{it} = \alpha_i + \tau_t + \beta_0 Vacc_{it} + \beta_d Days_{it} + \varepsilon_{it} \quad (SM1)$$

A negative coefficient for  $\beta_d$  would indicate a strengthening of the vaccine's mental health impacts, whereas a positive coefficient would indicate decay of such impact. For all four outcomes, the estimated coefficient  $\beta_d$  is negative, but statistically different from zero at the 5% level only for *severe mental distress*.

Table S.M 1. Time elapsed since first dose,

|                                                     | PHQ-4 Score<br>(standardized) | Mild mental<br>distress or<br>higher <sup>1</sup> | Moderate mental<br>distress or higher <sup>2</sup> | Severe mental<br>distress <sup>3</sup> |
|-----------------------------------------------------|-------------------------------|---------------------------------------------------|----------------------------------------------------|----------------------------------------|
| Has vaccine                                         | -0.030***                     | -0.009*                                           | -0.003                                             | -0.004                                 |
| Standard error                                      | (0.011)                       | (0.006)                                           | (0.004)                                            | (0.003)                                |
| Days elapsed since<br>vaccination (per 100<br>days) | -0.035                        | -0.070                                            | -.004                                              | -0.017**                               |
| Standard error                                      | (0.030)                       | (0.016)                                           | (0.012)                                            | (0.008)                                |
| Constant                                            | 1.961***                      | 0.291***                                          | 0.111***                                           | 0.045***                               |
| Observations                                        | 157,082                       | 157,082                                           | 157,082                                            | 157,082                                |
| R-squared                                           | 0.722                         | 0.617                                             | 0.529                                              | 0.506                                  |

Respondent fixed effects and survey-wave dummies included in the regression. <sup>1</sup> *Mild mental distress or higher* is an indicator variable that takes the value of one if PHQ-4 is equal to or higher than three and 0 otherwise; <sup>2</sup> *Moderate mental distress or higher* is an indicator variable that takes the value of one if PHQ-4 is equal to or higher than six and 0 otherwise; <sup>3</sup> *Severe mental distress* is an indicator variable that takes the value of one if PHQ-4 is equal to or higher than six and 0 otherwise. Standard errors clustered at the individual level \*\*\* p-value<0.01, \*\* p-value<0.05, \* p-value<0.1
